# Supplementary material
Source: publisher figshare collection journal article supplement (https://karger.figshare.com/ndownloader/files/12374156)
Supplement: Supplementary file 1 [file 12374156]

| **Artery** | **WT** | **AMPK** | ***WT*** | ***AMPK*** | **WT** | **AMPK** |
| --- | --- | --- | --- | --- | --- | --- |
| **Lean** | | ***Obese to Lean*** | | **Obese** | |
| **Thoracic Aorta** | 15±1 | 16±1 | *17±1****†*** | *20±2* | 11±1***** | 11±1***** |
| **Carotid** | 06±1 | 06±1 | *05±1****†*** | *06±1* | 06±1***** | 06±1***** |
| **Main Renal** | 05±1 | 06±1 | *08±1****†*** | *07±1* | 07±1***** | 08±1***** |
| **Segmental Renal** | 05±1 | 05±1 | *05±1****†*** | *05±1* | 05±1***** | 06±1***** |
|  |  |  |  |  |  |  |
